# Supplementary material for: Dynamic influence of pinning points on marine ice-sheet stability: a numerical study in Dronning Maud Land, East Antarctica
Source: Copernicus journal article supplement (doi:10.5194/tc-10-2623-2016), 2016-11-09
Supplement: Supplementary file 2 [file tc-10-2623-2016-supplement.zip]

Archive with 4 entries (4 files):
- tc-10-2623-2016-supplement-title-page.pdf
- supMovie.gif
- TCSup_Lionel_Favier.pdf
- TCSup_Lionel_Favier.tex
