# Supplementary material for: Dynamic influence of pinning points on marine ice-sheet stability: a numerical study in Dronning Maud Land, East Antarctica
Source: Copernicus journal article supplement (doi:10.5194/tc-10-2623-2016), 2016-11-09
Supplement: Supplementary file 2 [file tc-10-2623-2016-supplement.zip › tc-10-2623-2016-supplement-title-page.pdf]

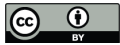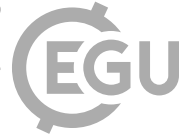

## *Supplement of*

# **Dynamic influence of pinning points on marine ice-sheet stability: a numerical study in Dronning Maud Land, East Antarctica**

**Lionel Favier et al.**

*Correspondence to:* Lionel Favier (lionel.favier@ulb.ac.be)

- tc-10-2623-2016-supplement-title-page.pdf
- TCSup\_Lionel\_Favier.pdf
- TCSup\_Lionel\_Favier.tex
- supMovie.gif

The copyright of individual parts of the supplement might differ from the CC-BY 3.0 licence.
