# Supplementary material for: Dynamic influence of pinning points on marine ice-sheet stability: a numerical study in Dronning Maud Land, East Antarctica
Source: Copernicus journal article supplement (doi:10.5194/tc-10-2623-2016), 2016-11-09
Supplement: Supplementary file 2 [file tc-10-2623-2016-supplement.zip › TCSup_Lionel_Favier.tex]

\documentclass[10pt,a4paper]{article}
\usepackage[utf8]{inputenc}
\usepackage[english]{babel}
\usepackage{amsmath}
\usepackage{amsfonts}
\usepackage{amssymb}
\usepackage{makeidx}
\usepackage{lmodern}
\usepackage{kpfonts}
\usepackage{natbib}
\usepackage{hyperref}
\usepackage{graphicx}

\usepackage{vmargin}            % redéfinir les marges
\setmarginsrb{2cm}{2cm}{2cm}{2cm}{0cm}{0cm}{0cm}{0cm}
\usepackage{color}

\parindent=0cm

\title{}

\begin{document}

\section*{Supplementary Figure 1}

%% FIGS %%%%%%%%%%%%%%%%%%%%%%%%%%%%
\begin{figure*}[!ht]
\vspace*{2mm}
\begin{center}
\includegraphics[width=14cm]{supfig/supFigure.pdf}
\end{center}%
{\textbf{Supplementary Figure 1.} Results of the data assimilation for linear sliding focussing on the TB/HB promontory where high velocity mismatch (shown by a circle) occurs due to poor consistency between the observations of high surface gradients and low surface velocities (Figure~4). (a) Thickness, (b) observed velocities, (c) stiffening factor and (d) friction coefficient. Contours show ice surface elevation every 50~m in the range 100-800~m.}
\end{figure*}

\newpage

\section*{Supplementary Figure 2}

%% FIGS %%%%%%%%%%%%%%%%%%%%%%%%%%%%
\begin{figure*}[!ht]
\vspace*{2mm}
\begin{center}
\includegraphics[width=7.5cm]{supfig/vafTotal.pdf}
\includegraphics[width=7.5cm]{supfig/res250m.pdf}
\includegraphics[width=7.5cm]{supfig/res500m.pdf}
\includegraphics[width=7.5cm]{supfig/res1000m.pdf}
\includegraphics[width=7.5cm]{supfig/res2000m.pdf}
\includegraphics[width=7.5cm]{supfig/res4000m.pdf}
\end{center}%
{\textbf{Supplementary Figure 2.} sensitivity to grid resolution between 250~m and 4000~m at the grounding line, performed for the $B_e/S/L/M_{b1}/A_m$ experiment. (a) Cumulative sea level changes. The 4000~m resolution simulation results in the lowest changes while the 250~m resolution results in the highest changes. The differences between 250~m and 500~m are not significant. The 500~m resolution was therefore chosen to run all the simulations discussed in the main paper. (b) to (f) Grounding-lines shown every 100~years (colorscale shown in (d)) for the resolution indicated at the top right of each panel.}
\end{figure*}

\newpage

\section*{Supplementary Figure 3}

%% FIGS %%%%%%%%%%%%%%%%%%%%%%%%%%%%
\begin{figure*}[!ht]
\vspace*{2mm}
\begin{center}
\includegraphics[width=7.5cm]{supfig/sup_melt50_m1_500m.pdf}
\includegraphics[width=7.5cm]{supfig/sup_melt50_m1_500m_cutMelt.pdf}
\end{center}%
{\textbf{Supplementary Figure 3.} Ice velocity profiles shown every 100~years for the (a) $B_e/S/L/M_{b1}/A_m$ experiment along the flowline shown in Figure~6(a), and (b) for the same experiment in which the sub ice-shelf melting is switched off beneath the Hansenbreen ice shelf when the grounding line retreats over the upsloping part of the bed. The sub ice-shelf melting for other parts of the computational domain are not altered. The grounding line position is marked by the limit between solid and dashed parts of profiles.}
\end{figure*}

\newpage

\section*{Supplementary Movie}

\begin{figure*}[!ht]
\vspace*{2mm}
\begin{center}
\includegraphics[width=15cm]{supfig/supMovieM1_00190.jpg}
\end{center}%
{\textbf{Supplementary Movie.} Ice-sheet changes in Hansenbreen for the next millennium simulated by the $B_e/S/L/M_{1}/A_m$ experiment, shown every decade. (a) Migration of the grounding line: flow-field from \cite{Berger2016} in the background, with ice-flow direction indicated by the arrows, the thick black lines show the grounding line and the calving front, ice-surface elevation contours every 100~m and a flowline is shown in yellow. (b) Ice velocity profiles along the (a) flowline: the solid and dashed black lines indicates grounded and floating ice (shown here for the year 190 after relaxation).}
\end{figure*}

\newpage

\section*{Supplementary Table}

\begin{table}[!ht]
{\textbf{Supplementary Table.} Observed and initially modelled sub-ice shelf melt rates by drainage basins in Gt~a$^{-1}$, from West to East within the computational domain (Figure~1). Our initial melt rates are comparable to what is given in \cite{Rignot2013a} and to a Personal Communication (PC) from M. Depoorter (using the same technique as in \cite{Depoorter2013}). The exact numbers could not be reproduced for the medium melt-rates experiments since the sub-ice shelf melt rates are constrained by unique values over the computational domain. LIS: Lazarev ice shelf; UG: Unnamed Glacier; TB: Tussebreen; HB: Hansenbreen; RBIS: Roi Baudouin ice shelf.}
\vskip4mm
\centering
\begin{tabular}{l l c c c c c c}
\hline
Glacier & & LIS & UG & TB & HB & RBIS & total\\
\hline
Observations & \cite{Depoorter2013} + PC & 1.8 & 0.5 & 3.6 & 3.7 & 20.2 & 29.8\\
 & \cite{Rignot2013a} & 6.3 & \multicolumn{3}{c}{7.5 (UG+TB+HB)} & 14.1 & 27.9\\
\hline
Simulations & Low rates & 0.65$\pm$0.05 & 2.5$\pm$0.5 & 2.75$\pm$0.25 & 1.5$\pm$0.5 & 7$\pm$1 & 15$\pm$0.5 \\
 & Medium rates & 1.4$\pm$0.2 & 4.5$\pm$0.4 & 4.9$\pm$0.1 & 2.5$\pm$0.5 & 14$\pm$2 & 28$\pm$2 \\
 & High rates & 2.2$\pm$0.3 & 6.9$\pm$0.4 & 7.1$\pm$0.15 & 4.5$\pm$1.5 & 22$\pm$3 & 42$\pm$2 \\
\hline
\end{tabular}
\label{tab:parameters}
\end{table}


%
%
%%% TABLES %%%%%%%%%%%%%%%%%%%%%%%%%%%%%%%%%%%%%%%%%%%%%%%%%%%%%%%%%%%%%%%%%%%%
%
%\begin{table}[t]
%\caption{Numerical values of the parameters adopted for the simulations.}
%\vskip4mm
%\centering
%\begin{tabular}{l l l l}
%\hline
%Parameter & Symbol & Value & Unit \\
%\hline
%Fluidity parameter & A & $10^{-25}$ & Pa$^{-3}$ s$^{-1}$ \\
%Seconds per year & & 31536000 & s a$^{-1}$ \\
%Accumulation rate & $a_s$ & 0.5 & m a$^{-1}$ \\
%Melting/accretion & $a_b$ & 0 & m a$^{-1}$ \\
%Glen's exponent & $n$ & 3 & \\
%Bed friction parameter & C & $10^{7}$ & Pa m$^{-1/3}$ s$^{1/3}$ \\
%Bed friction exponent & m & 1/3 & \\
%Sea density & $\rho_w$ & 1000 & kg m$^{-3}$ \\
%Ice density & $\rho_i$ & 900 & kg m$^{-3}$ \\
%Standard Gravity & $g$ & 9.81 & kg m$^{-3}$ \\
%\hline
%Domain length & $L$ & 800 & km \\
%Domain half width & $W$ & 50 & km \\
%Maximum refinement & & 50 & m \\
%\hline
%\end{tabular}
%\label{tab:parameters}
%\end{table}


% bibliographie
%\bibliographystyle{copernicus}
%\bibliography{/home/lfavier/Documents/Bibliographie/library}

\begin{thebibliography}{3}
\providecommand{\natexlab}[1]{#1}
\providecommand{\url}[1]{{\tt #1}}
\providecommand{\urlprefix}{URL }
\expandafter\ifx\csname urlstyle\endcsname\relax
  \providecommand{\doi}[1]{doi:\discretionary{}{}{}#1}\else
  \providecommand{\doi}{doi:\discretionary{}{}{}\begingroup
  \urlstyle{rm}\Url}\fi

\bibitem[{Berger et~al.(2016)Berger, Favier, Drews, Derwael, and
  Pattyn}]{Berger2016}
Berger, S., Favier, L., Drews, R., Derwael, J.-J., and Pattyn, F.: {The control
  of an uncharted pinning point on the flow of an Antarctic ice shelf}, Journal
  of Glaciology, 62, 37--45, \doi{10.1017/jog.2016.7}, 2016.

\bibitem[{Depoorter et~al.(2013)Depoorter, Bamber, Griggs, Lenaerts,
  Ligtenberg, van~den Broeke, and Moholdt}]{Depoorter2013}
Depoorter, M.~a., Bamber, J.~L., Griggs, J.~a., Lenaerts, J. T.~M., Ligtenberg,
  S. R.~M., van~den Broeke, M.~R., and Moholdt, G.: {Calving fluxes and basal
  melt rates of Antarctic ice shelves.}, Nature, 502, 89--92,
  \doi{10.1038/nature12567},
  \urlprefix\url{http://www.ncbi.nlm.nih.gov/pubmed/24037377}, 2013.

\bibitem[{Rignot et~al.(2013)Rignot, Jacobs, Mouginot, and
  Scheuchl}]{Rignot2013a}
Rignot, E., Jacobs, S., Mouginot, J., and Scheuchl, B.: {Ice-Shelf Melting
  Around Antarctica}, Science, 341, 266--270, \doi{10.1126/science.1235798},
  \urlprefix\url{http://www.sciencemag.org/cgi/doi/10.1126/science.1235798},
  2013.

\end{thebibliography}


\end{document}
