# Supplementary figures and images for: Dynamic influence of pinning points on marine ice-sheet stability: a numerical study in Dronning Maud Land, East Antarctica
Source: Copernicus journal article supplement (doi:10.5194/tc-10-2623-2016), 2016-11-09

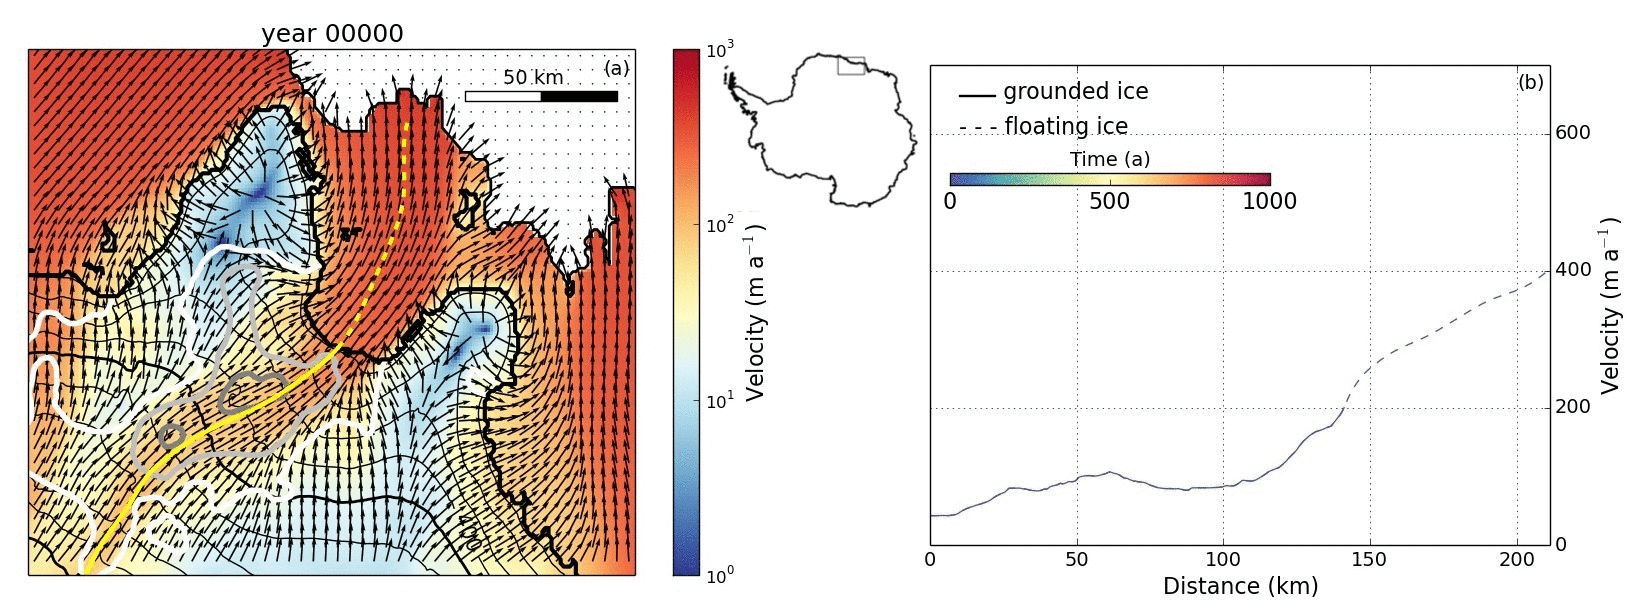

Supplement: Supplementary file 2 [file tc-10-2623-2016-supplement.zip › supMovie.gif]
